# Supplementary material for: Facile strategy to incorporate amidoxime groups into elastomers toward self-crosslinking and self-reinforcement
Source: Royal Society of Chemistry journal article supplement (doi:10.1039/d2py00991a), 2022-01-01
Supplement: d2py00991a1.pdf [file d2py00991a1.pdf]

## **Electronic Supplementary Information (ESI)**

# **Facile Strategy to Incorporate Amidoxime Groups into Elastomers toward Self-Crosslinking and Self-Reinforcement**

*Chenru Tian, Haoran Feng, Yuchen Qiu, Ganggang Zhang\*, Tianwei Tan and Liqun Zhang\**

State Key Laboratory of Organic-Inorganic Composites, Beijing University of Chemical Technology, Beijing 100029, P. R. China

No.15 North Third Ring Road East, Chaoyang District, Beijing, 100029, China

\*Corresponding authors:

E-mail: zhanglq@mail.buct.edu.cn, zhang-gang-gang@qq.com

**Number of pages: 9**

**Number of figures: 11**

**Number of tables: 3**

---

## Equilibrium swelling experiments.

Total crosslinking density was determined by equilibrium swelling experiments. The vulcanizates were immersed in toluene at room temperature for 72 h. Then, the samples were removed from the solvent, and immediately weighed after wiping off the surface residual toluene, and then dried in a vacuum oven at 60 °C until a constant weight. The sol fraction is calculated according to  $(m_0 - m_2)/m_0$ , and the swelling ratio is defined as  $(m_1 - m_2)/m_2$ , where  $m_0$  is the weight of the sample before swelling, and  $m_1$  and  $m_2$  are the sample masses before and after drying, respectively. The crosslinking density was determined by the classical Flory–Rehner equation.

$$V_e = - \frac{\ln(1 - V_r) + V_r + \chi V_r^2}{V_s \left( V_r^3 - \frac{V_r}{2} \right)}$$

$V_r$  is the volume fraction of rubber in the swollen gel,  $V_s$  is the molar volume of the solvent (106.5 cm<sup>3</sup>/mol for toluene), and  $\chi$  is the Flory-Huggins solvent-polymer interaction parameter and is calculated as below:

$$\chi = 0.487 + 0.228 * V_r$$

$V_r$  was calculated according to the equation below:

$$V_r = - \frac{(m_2 - m_0\varphi)/\rho_r}{\frac{(m_2 - m_0\varphi)}{\rho_r} + \frac{(m_1 - m_2)}{\rho_s}}$$

$\varphi$  is the weight fraction of the insoluble components (in this system it should be considered as 0), and  $\rho_r$  and  $\rho_s$  are the density of rubber and solvent, respectively.

Covalent crosslinking density was determined by equilibrium swelling experiments as well. The vulcanizates were immersed in dichloroacetic acid/toluene solution (volume ratio 1:4) at room temperature for 72 h (replace the solution every 24 hours).<sup>1</sup> The subsequent processing and calculation methods are consistent with total crosslinking density.

**Table S1.** Mechanical properties of virgin NBR and AO-NBR

| Samples    | Stress at 100% (MPa) | Stress at 300% (MPa) | Tensile Stress (MPa) | Elongation at break (%) |
|------------|----------------------|----------------------|----------------------|-------------------------|
| Virgin NBR | 0.5                  | 0.4                  | 0.5                  | 1825                    |
| AO-NBR-2   | 0.7                  | 0.7                  | 1.6                  | 1818                    |
| AO-NBR-5   | 0.9                  | 1.0                  | 2.5                  | 1152                    |
| AO-NBR-10  | 1.3                  | 2.1                  | 5.3                  | 650                     |
| AO-NBR-15  | 1.3                  | 2.4                  | 5.6                  | 608                     |

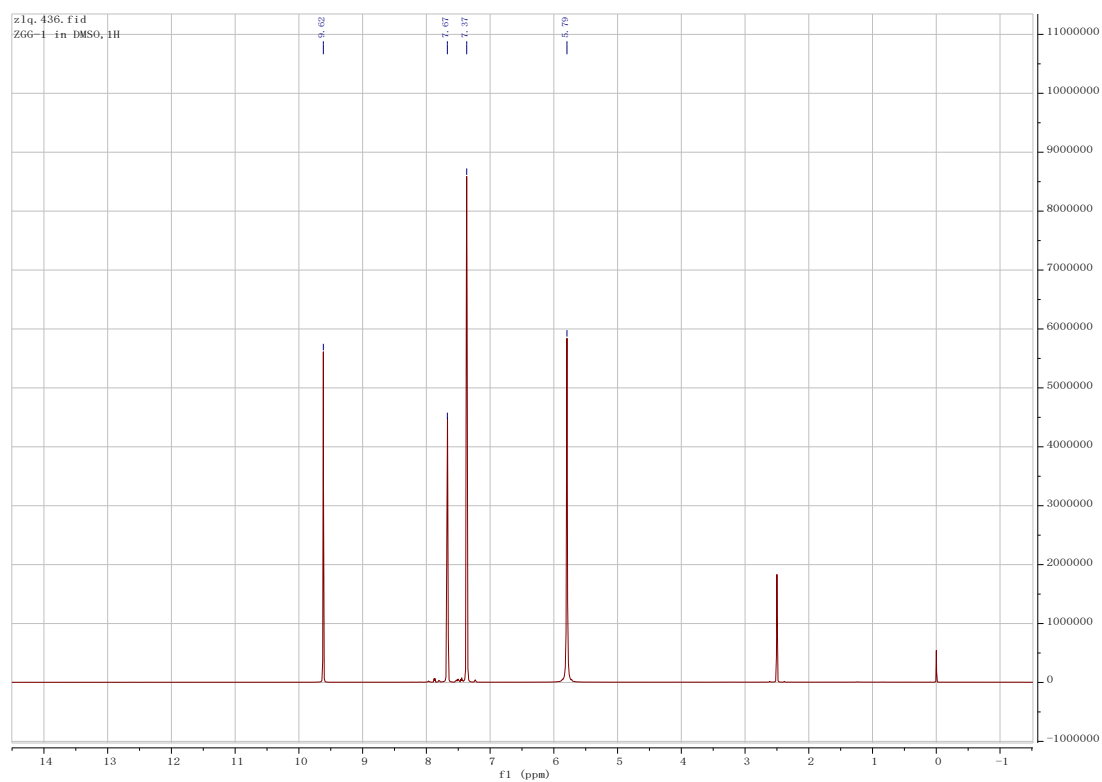

**Fig S1.** <sup>1</sup>H NMR spectrum of BAO.

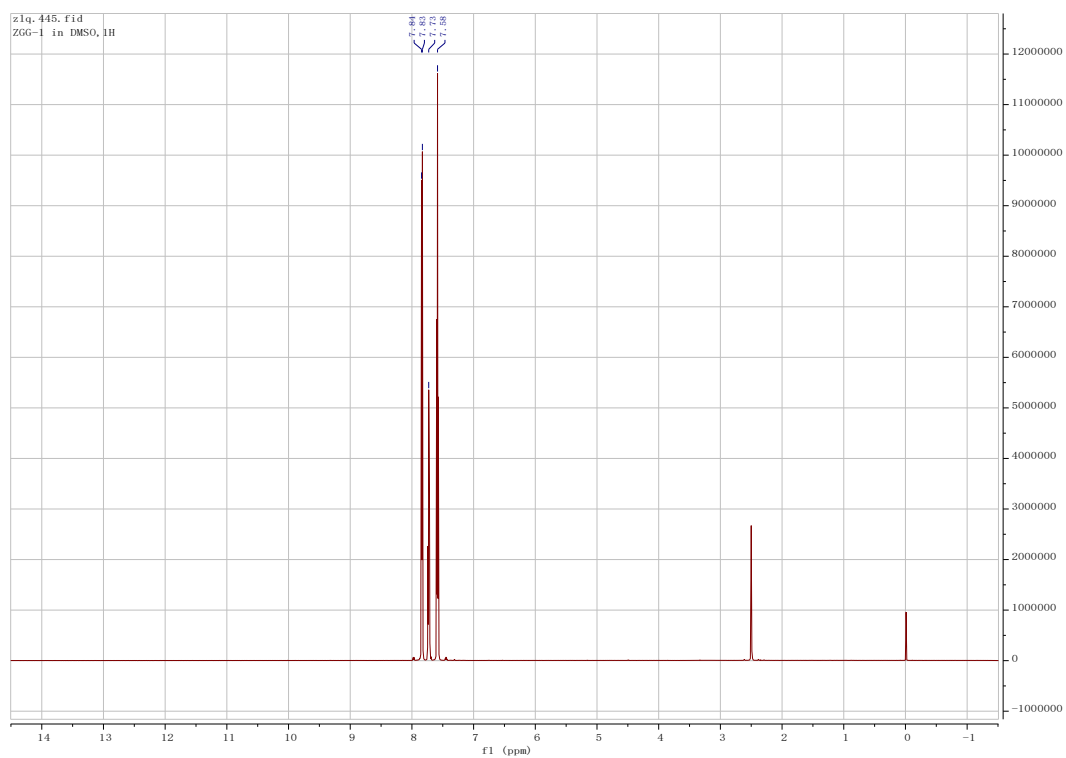

**Fig S2.**  $^1\text{H}$  NMR spectrum of BN

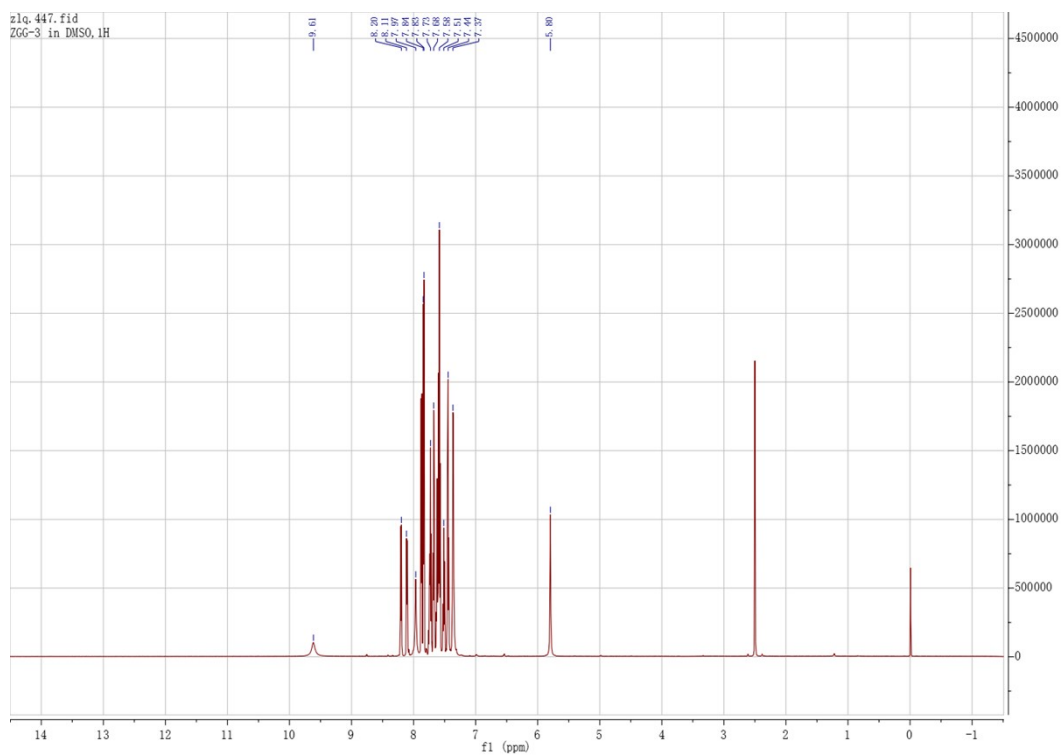

**Fig S3.**  $^1\text{H}$  NMR spectrum of the mixture of BAO and BN at 160 °C for 2 h.

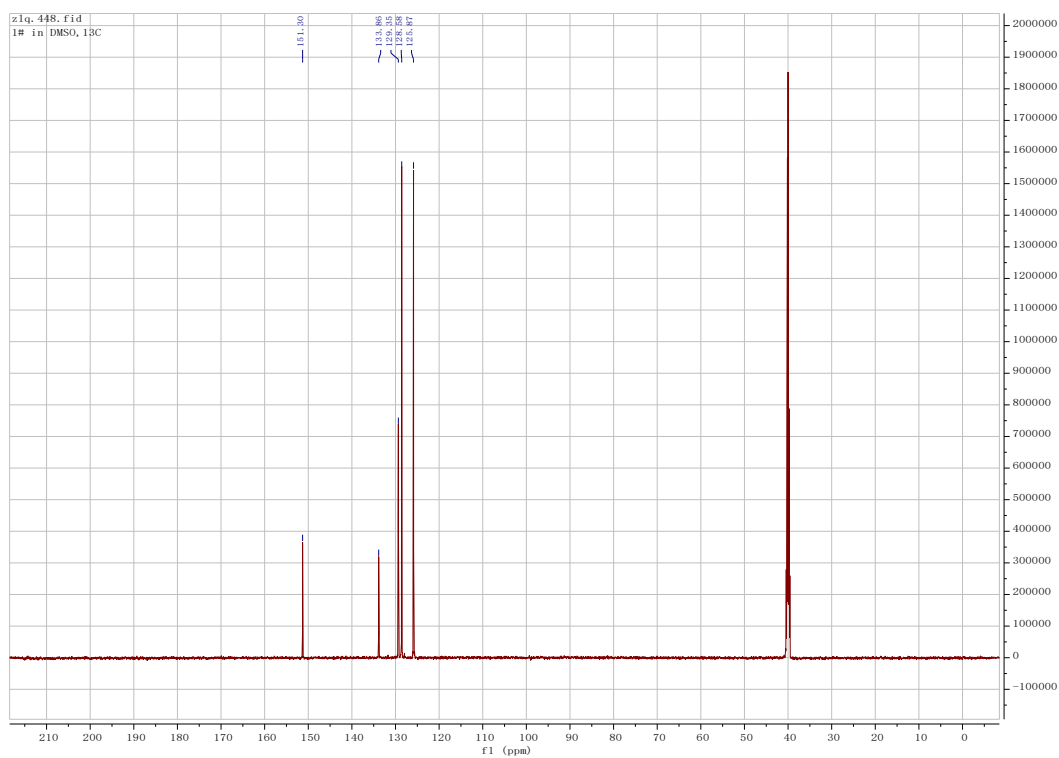

**Fig S4.**  $^{13}\text{C}$  NMR spectrum of BAO.

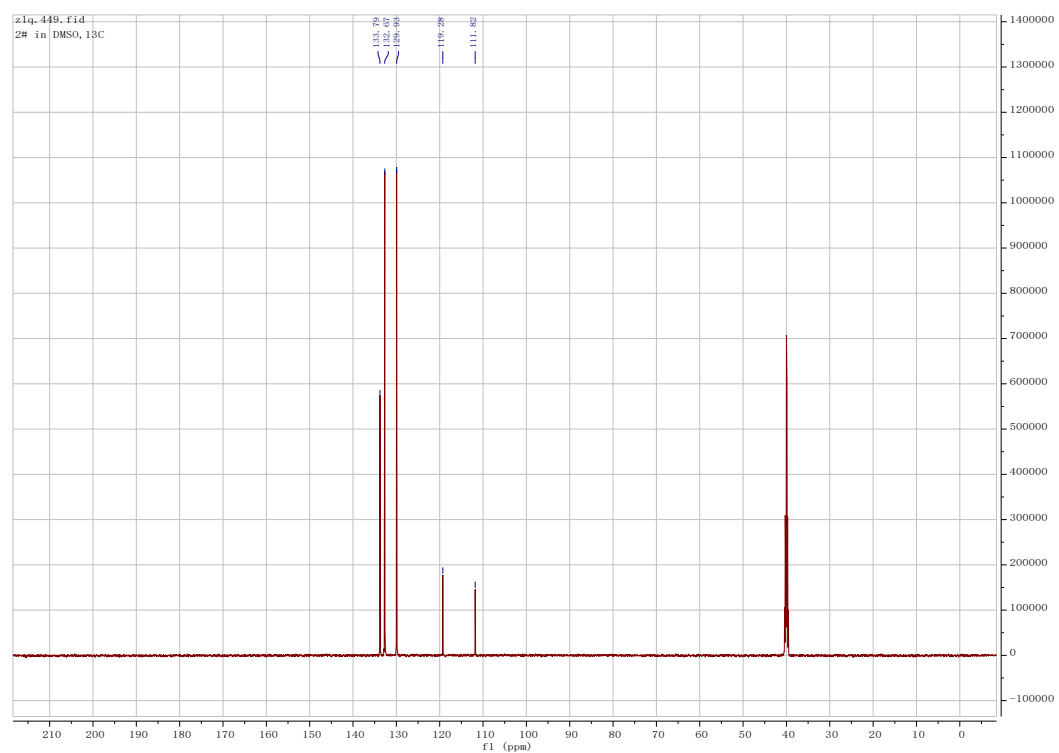

**Fig S5.**  $^{13}\text{C}$  NMR spectrum of BN

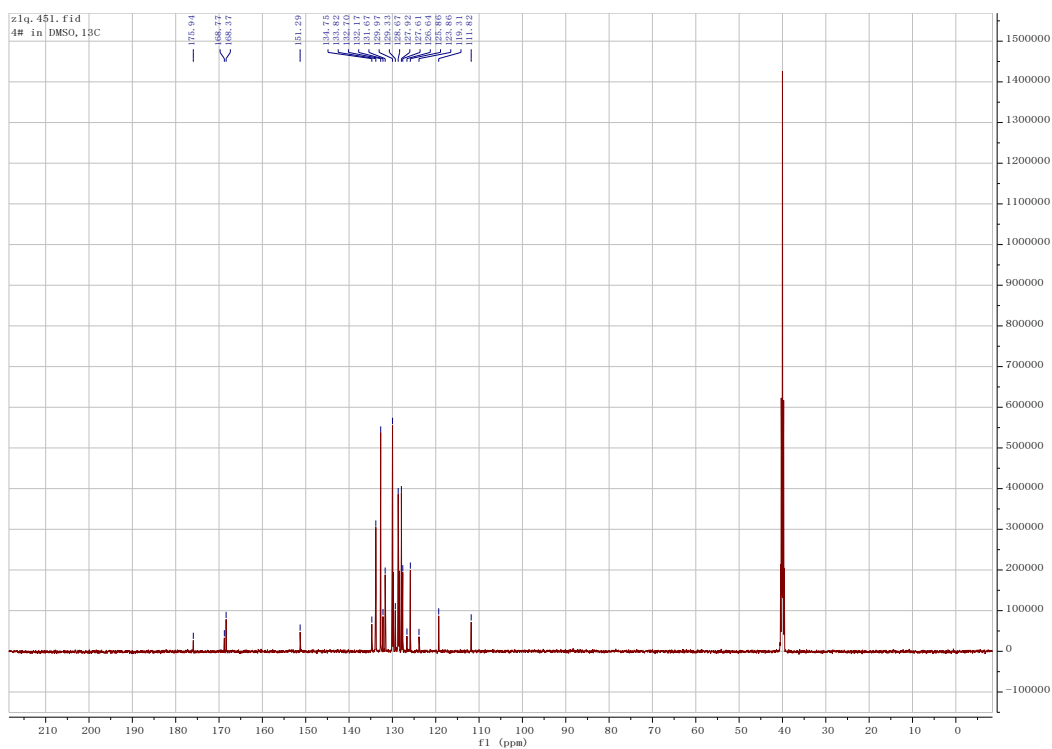

**Fig S6.**  $^{13}\text{C}$  NMR spectrum of the mixture of BAO and BN at 160 °C for 2 h.

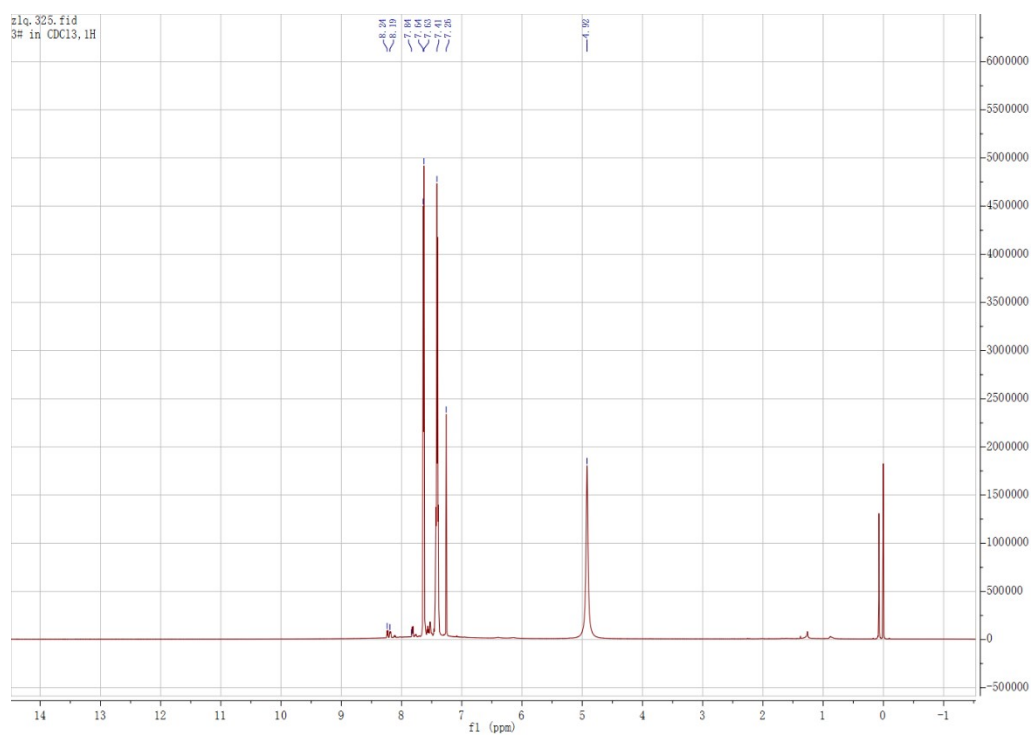

**Fig S7.**  $^1\text{H}$  NMR spectrum of BAO at 160 °C for 2 h.

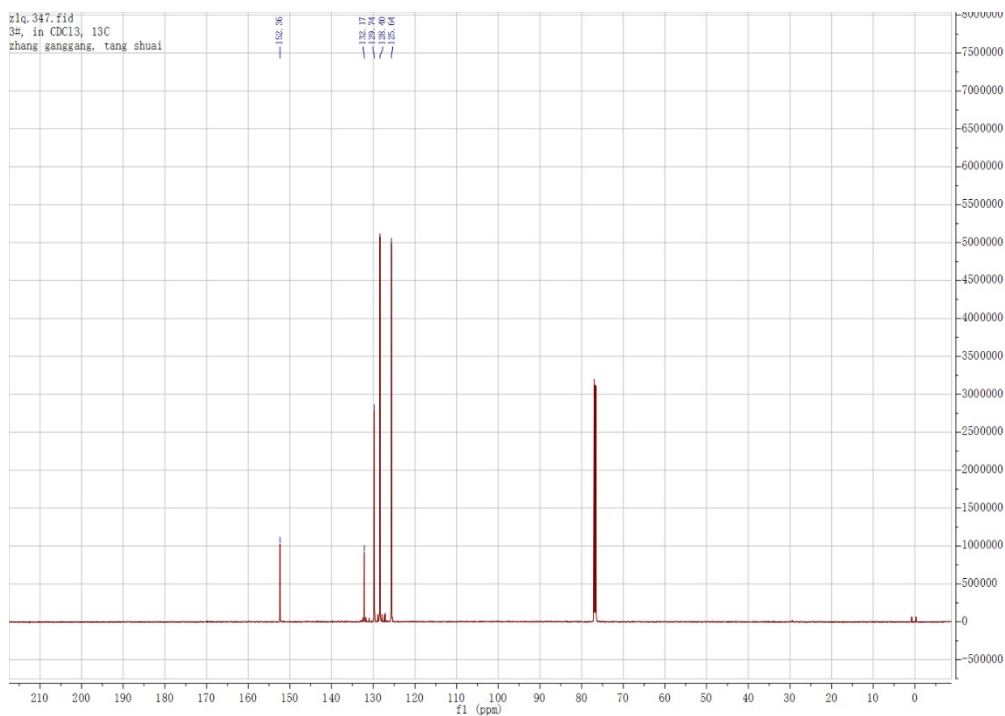

**Fig S8.**  $^{13}\text{C}$  NMR spectrum of BAO at 160 °C for 2 h.

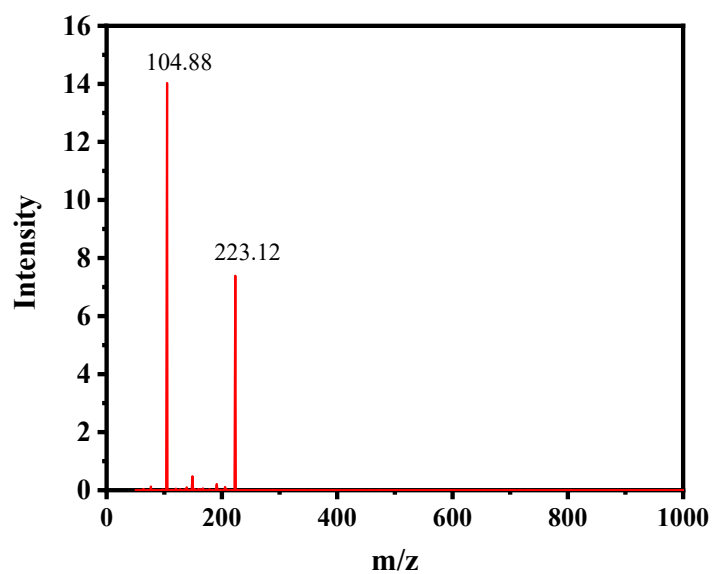

**Fig S9.** mass spectrum of the mixture of BAO and BN at 160 °C for 2 h

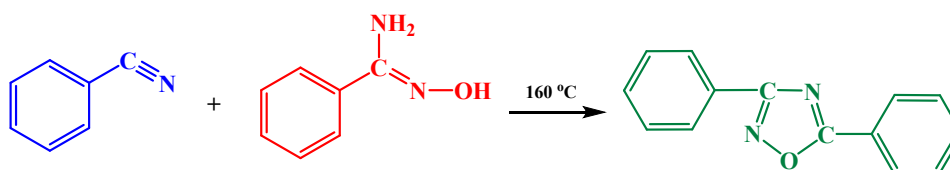

**Scheme S1.** Schematic illustration of the chemical reaction between BAO and BN.

**Table S2.** Mechanical properties of AO-NBR-*d* with different amidoxime concentration and molding time

| Samples                       | Stress at 100%<br>(MPa) | Stress at 300%<br>(MPa) | Tensile Strength<br>(MPa) | Elongation at<br>break (%) |
|-------------------------------|-------------------------|-------------------------|---------------------------|----------------------------|
| AO-NBR-5- <i>d</i> -30<br>min | 1.9                     | 5.4                     | 5.9                       | 326                        |
| D-AO-NBR-10- <i>d</i> -30 min | 6.6                     | -                       | 20.7                      | 259                        |
| D-AO-NBR-15- <i>d</i> -30 min | 14.4                    | -                       | 16.8 (Yield)              | 133                        |
| D-AO-NBR-10- <i>d</i> -20 min | 5.2                     | -                       | 16.6                      | 270                        |
| D-AO-NBR-10- <i>d</i> -40 min | 8.7                     | -                       | 16.4                      | 173                        |

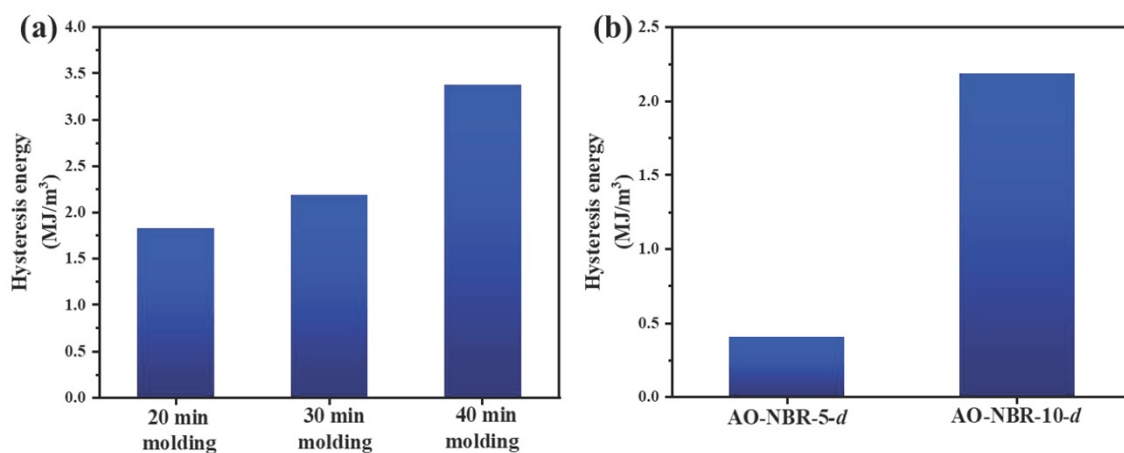**Fig. S10.** Calculated hysteresis energy through first tensile cycle with AO-NBR-*d*, (a) with different molding time, (b) with various amidoxime concentration.



**Table S3.** Mechanical properties of T-AO-NBR nanocomposites with different amidoxime degree and

Zn(Ac)<sub>2</sub> content

| Sample                   | Stress at 100% (MPa) | Stress at 300% (MPa) | Tensile Stress (MPa) | Elongation at break (%) |
|--------------------------|----------------------|----------------------|----------------------|-------------------------|
| AO-NBR- <i>t</i> -0.5 Zn | 2.9                  | 7.0                  | 19.9                 | 605                     |
| AO-NBR- <i>t</i> -1 Zn   | 3.1                  | 8.6                  | 25.2                 | 579                     |
| AO-NBR- <i>t</i> -2 Zn   | 6.0                  | 15.2                 | 28.3                 | 447                     |
| AO-NBR-5- <i>t</i> -Zn   | 3.2                  | 8.8                  | 12.4                 | 408                     |
| AO-NBR-15- <i>t</i> -Zn  | -                    | -                    | Yield (33.1)         | 70                      |

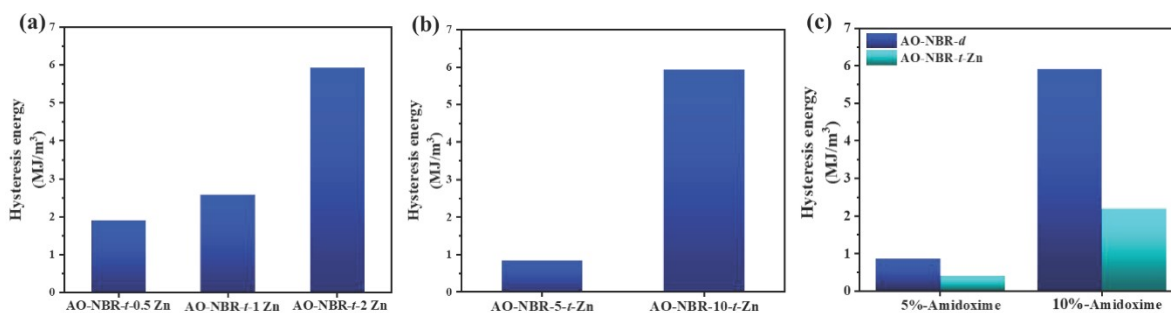

**Fig. S11.** Calculated hysteresis energy through first tensile cycle with AO-NBR-*t*-Zn (a) with different Zn contents, (b) with various amidoxime concentration; (c) Hysteresis energy comparison between AO-NBR-*d* and AO-NBR-*t*-Zn.

1. J. Liu, S. Wang, Z. Tang, J. Huang, B. Guo and G. Huang, *Macromolecules*, 2016, **49**, 8593-8604.
